# Supplementary material for: Potentially Inappropriate Medications in Older Adults—Prevalence, Trends and Associated Factors: A Cross-Sectional Study in Saudi Arabia
Source: MDPI journal article supplement (doi:10.3390/healthcare11142003), 2023-07-12
Supplement: s1 [file s1]

**Supplementary Table S1.** Characteristics of older adults (≥65 years) visiting KSUMC <sup>a</sup> outpatient clinics in 2017-2019 by sex.

| Characteristics                                                                                        | Male             |                  |                  | Female           |                  |                  |
|--------------------------------------------------------------------------------------------------------|------------------|------------------|------------------|------------------|------------------|------------------|
|                                                                                                        | 2017<br>(n=7261) | 2018<br>(n=8597) | 2019<br>(n=8882) | 2017<br>(n=7213) | 2018<br>(n=8258) | 2019<br>(n=8511) |
| Nationality, %                                                                                         |                  |                  |                  |                  |                  |                  |
| Saudi                                                                                                  | 91.8             | 91.4             | 91.2             | 93.4             | 93.6             | 93.3             |
| Non-Saudi                                                                                              | 8.2              | 8.6              | 8.8              | 6.6              | 6.4              | 6.7              |
| Age group (years), %                                                                                   |                  |                  |                  |                  |                  |                  |
| 65–69                                                                                                  | 36.8             | 38.3             | 38.6             | 40.7             | 42.4             | 43.4             |
| 70–74                                                                                                  | 28.0             | 27.5             | 26.3             | 26.7             | 25.8             | 25.0             |
| 75–79                                                                                                  | 20.0             | 18.8             | 19.4             | 17.6             | 16.8             | 17.3             |
| 80–84                                                                                                  | 10.1             | 10.3             | 10.2             | 9.0              | 8.9              | 8.7              |
| ≥85                                                                                                    | 5.2              | 5.2              | 5.5              | 6.1              | 6.0              | 5.5              |
| Dispensed at least one medication, %                                                                   | 85.7             | 87.2             | 86.8             | 88.2             | 90.1             | 88.7             |
| Yearly number of dispensed medications,<br>Median, (interquartile range)                               | 5, (2-8)         | 6, (2-10)        | 6, (2-10)        | 6, (3-10)        | 8, (3-12)        | 8, (3-12)        |
| Number of dispensed medications within a<br>100-day period following the first dispensation<br>date, % |                  |                  |                  |                  |                  |                  |
| 0                                                                                                      | 14.3             | 12.8             | 13.2             | 11.8             | 9.9              | 11.3             |
| 1                                                                                                      | 10.9             | 8.9              | 9.1              | 9.0              | 7.6              | 8.2              |
| 2–4                                                                                                    | 31.1             | 22.8             | 23.4             | 27.7             | 21.1             | 20.6             |
| ≥5                                                                                                     | 43.7             | 55.5             | 54.3             | 51.5             | 61.4             | 59.9             |
| Number of dispensed PIMs <sup>b</sup> , %                                                              |                  |                  |                  |                  |                  |                  |
| 0                                                                                                      | 46.0             | 38.9             | 42.4             | 39.5             | 33.8             | 36.7             |
| 1                                                                                                      | 25.0             | 23.6             | 23.9             | 25.7             | 22.3             | 22.5             |
| 2                                                                                                      | 16.6             | 19.5             | 18.5             | 18.4             | 19.9             | 19.1             |
| 3                                                                                                      | 8.1              | 10.9             | 9.5              | 10.3             | 13.2             | 12.1             |
| 4                                                                                                      | 3.0              | 5.0              | 3.9              | 3.9              | 6.6              | 6.2              |
| ≥5                                                                                                     | 1.2              | 2.1              | 2.0              | 2.2              | 4.2              | 3.4              |
| Most common dispensed medications, %                                                                   |                  |                  |                  |                  |                  |                  |
| Atorvastatin                                                                                           | 34.9             | 36.3             | 37.3             | 36.7             | 39.2             | 38.7             |
| Metformin                                                                                              | 31.3             | 32.7             | 32.9             | 33.4             | 34.9             | 34.5             |
| Aspirin                                                                                                | 29.9             | 40.0             | 35.7             | 25.5             | 35.1             | 30.8             |
| Pantoprazole                                                                                           | 23.3             | 26.9             | 24.9             | 28.9             | 33.1             | 31.7             |

|                                                           |      |      |      |      |      |      |
|-----------------------------------------------------------|------|------|------|------|------|------|
| Cholecalciferol                                           | 13.7 | 15.7 | 16.2 | 30.1 | 34.2 | 33.3 |
| Most common diagnoses, %                                  |      |      |      |      |      |      |
| Hypertension                                              | 38.5 | 36.4 | 35.2 | 47.1 | 44.5 | 40.7 |
| Diabetes mellitus                                         | 42.1 | 38.0 | 37.0 | 42.3 | 39.8 | 37.0 |
| Disorders of lipoprotein metabolism and other lipidaemias | 26.4 | 25.8 | 24.4 | 34.5 | 33.7 | 30.4 |

---

<sup>a</sup> King Saud University Medical City

<sup>b</sup> Potentially inappropriate medications
